# Supplementary material for: Accelerating Gut Microbiome Research with Robust Sample Collection
Source: Preprints.org preprint supplement (doi:10.20944/preprints202101.0047.v1), 2021-01-04
Supplement: Supplementary file 1 [file supplementary]

## Sheet: metadata
sample-id	input	filtered	percentage of input passed filter	denoised	non-chimeric	percentage of input non-chimeric
06172020-QC	82474	78152	94.76	76408	53291	64.62
06172020-TMX	74991	71047	94.74	69748	44904	59.88
136310	86057	80965	94.08	79978	34588	40.19
136312	65643	62042	94.51	61048	32304	49.21
136316	76569	72162	94.24	70872	40890	53.4
136320	76276	72193	94.65	71047	39698	52.05
136330	72171	68245	94.56	67175	35866	49.7
136617	80376	75599	94.06	74414	38486	47.88
136620	62738	59255	94.45	58182	33528	53.44
136622	71141	66771	93.86	65524	32324	45.44
136625	78531	73942	94.16	72937	40663	51.78
136628	73543	69084	93.94	68258	34000	46.23
136738	79258	74529	94.03	73396	34267	43.23
136742	69888	65806	94.16	64717	31320	44.81
136745	80182	75224	93.82	74309	34311	42.79
136752	77262	72697	94.09	71481	37578	48.64
136756	70144	65903	93.95	64952	33963	48.42
Average	75132	70800.9	94.2388	69673.3	37175.4	49.5124
Standard Dev	6051.98	5677.97	0.31026	5620.15	5556.42	6.14223
