# Supplementary figures and images for: Accelerating Gut Microbiome Research with Robust Sample Collection
Source: Preprints.org preprint supplement (doi:10.20944/preprints202101.0047.v1), 2021-01-04

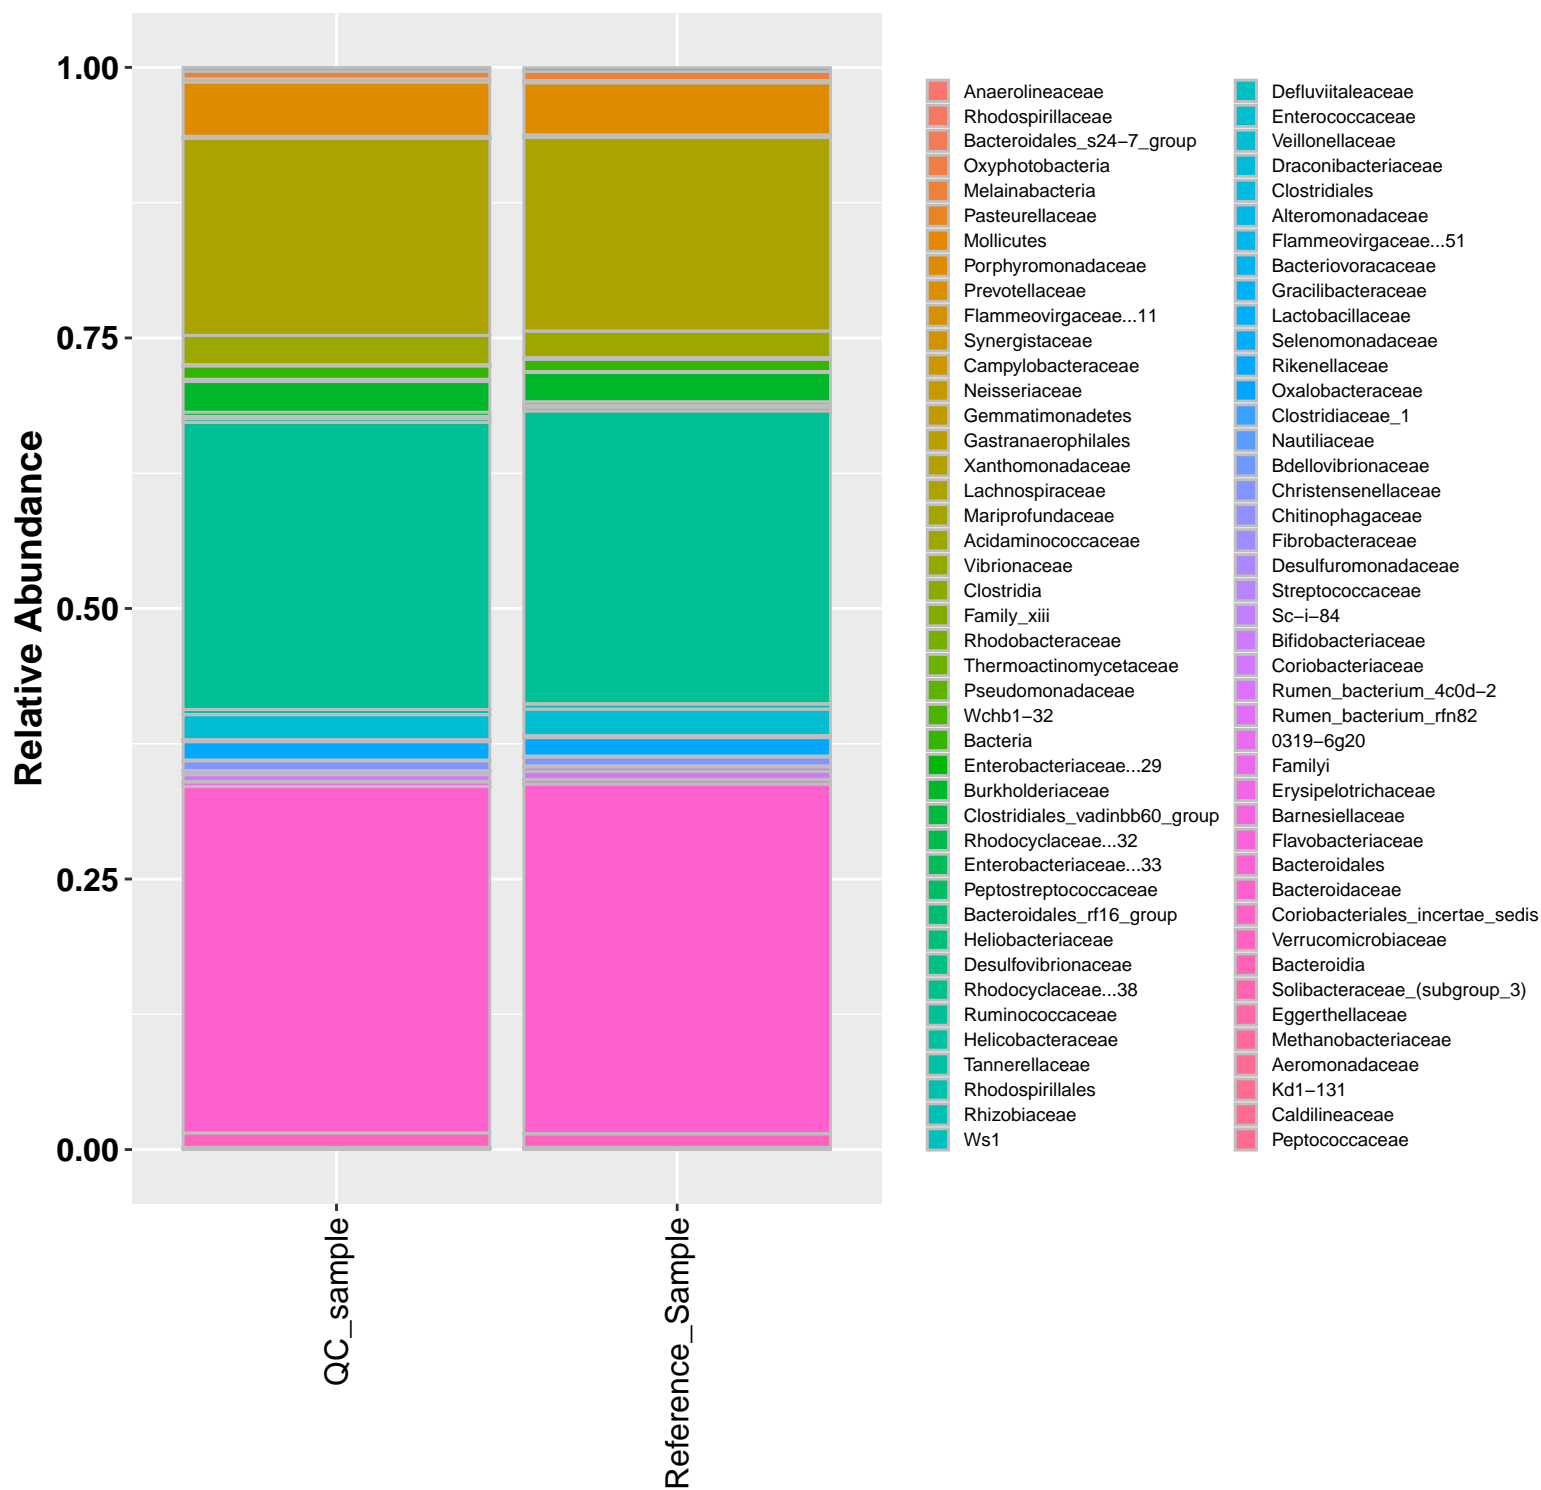

Supplement: Supplementary file 1 [file supplementary]
